# Supplementary material for: Deep Brain Stimulation of Anteromedial Globus Pallidus Interna for Severe Tourette's Syndrome
Source: Atypon-hosted journal article supplement (doi:10.1176/appi.ajp.2012.11101583), 2012-08-01

**TABLE S1****Stimulation Parameters for the Patients at time of Final Assessment**

| Patient No. | System  | Wave Amplitude (V) | Pulse Width ( $\mu$ sec) | Frequency (Hz) |
|-------------|---------|--------------------|--------------------------|----------------|
| 1           | Activa  | 4.6                | 90                       | 160            |
| 2           | Soletra | 4                  | 60                       | 160            |
| 3           | Activa  | 4.2                | 120                      | 130            |
| 4           | Soletra | 3.6                | 120                      | 100            |
| 5           | Soletra | 3.3                | 90                       | 160            |
| 6           | Activa  | 5                  | 120                      | 160            |
| 7           | Activa  | 5                  | 90                       | 160            |
| 8           | Activa  | 4.6                | 90                       | 130            |
| 9           | Activa  | 4                  | 90                       | 160            |
| 10          | Soletra | 3.7                | 60                       | 130            |
| 11          | Soletra | 3                  | 60                       | 160            |

**TABLE S2****Individual Patient Yale-Brown Obsessive Compulsive Scale (YBOCS), Hamilton Depression Rating Scale (HDRS), and Gilles de la Tourette Quality of Life Scale (GTS-QOL) Scores Before DBS and at Final Follow Up**

| Patient No. | YBOCS Pre | YBOCS Post | HDRS Pre | HDRS Post | GAF Pre | GAF Post | GTS-QOL Pre | GTS-QOL Post |
|-------------|-----------|------------|----------|-----------|---------|----------|-------------|--------------|
| 1           | 25        | 0          | 26       | 5         | 50      | 70       | 40          | 80           |
| 2           | 30        | 17         | 16       | 7         | 20      | 50       | 20          | 60           |
| 3           | 22        | 0          | 17       | 0         | 50      | 70       | 30          | 70           |
| 4           | 19        | 7          | 17       | 1         | 60      | 80       | 70          | 100          |
| 5           | 31        | 24         | 26       | 5         | 50      | 80       | 65          | 85           |
| 6           | 27        | 20         | 15       | 8         | 40      | 80       | 20          | 90           |
| 7           | 0         | 0          | 9        | 0         | 50      | 90       | 15          | 90           |
| 8           | 0         | 0          | 4        | 0         | 80      | 90       | 70          | 90           |
| 9           | 0         | 0          | 26       | 8         | 30      | 80       | 15          | 80           |
| 10          | 20        | 4          | 18       | 4         | 40      | 80       | 50          | 80           |
| 11          | 0         | 0          | 7        | 9         | 50      | 50       | 35          | 45           |

**TABLE S3****Individual Patient Total Yale Global Tic Severity Scale Scores Before DBS and at Final Follow-Up**

| Patient No. | Final follow up (months) | M Pre | M Post | V pre | V post | TTSS | TTSS Post | TYGTSS Pre | TYGTSS Post |
|-------------|--------------------------|-------|--------|-------|--------|------|-----------|------------|-------------|
| 1           | 12                       | 21    | 16     | 10    | 6      | 31   | 22        | 81         | 62          |
| 2           | 30                       | 25    | 22     | 25    | 20     | 50   | 42        | 100        | 82          |
| 3           | 14                       | 18    | 11     | 12    | 4      | 30   | 15        | 50         | 45          |
| 4           | 18                       | 22    | 11     | 22    | 11     | 44   | 21        | 84         | 31          |
| 5           | 26                       | 22    | 14     | 20    | 12     | 42   | 26        | 92         | 56          |
| 6           | 5                        | 21    | 8      | 16    | 5      | 37   | 13        | 77         | 23          |
| 7           | 10                       | 25    | 8      | 20    | 4      | 45   | 12        | 95         | 22          |
| 8           | 5                        | 24    | 8      | 14    | 0      | 38   | 8         | 88         | 18          |
| 9           | 6                        | 22    | 2      | 25    | 6      | 47   | 8         | 97         | 18          |
| 10          | 10                       | 22    | 4      | 18    | 2      | 40   | 6         | 80         | 26          |
| 11          | 4                        | 24    | 24     | 16    | 16     | 50   | 50        | 85         | 85          |

M = motor; V – vocal tics; TSS = M+V; TYGTSS = TSS+impairment

## FIGURE S1

Surgical Planning of Deep Brain Stimulation of The Antero-Medial Globus Pallidus Interna in a Patient With Tourette's Syndrome

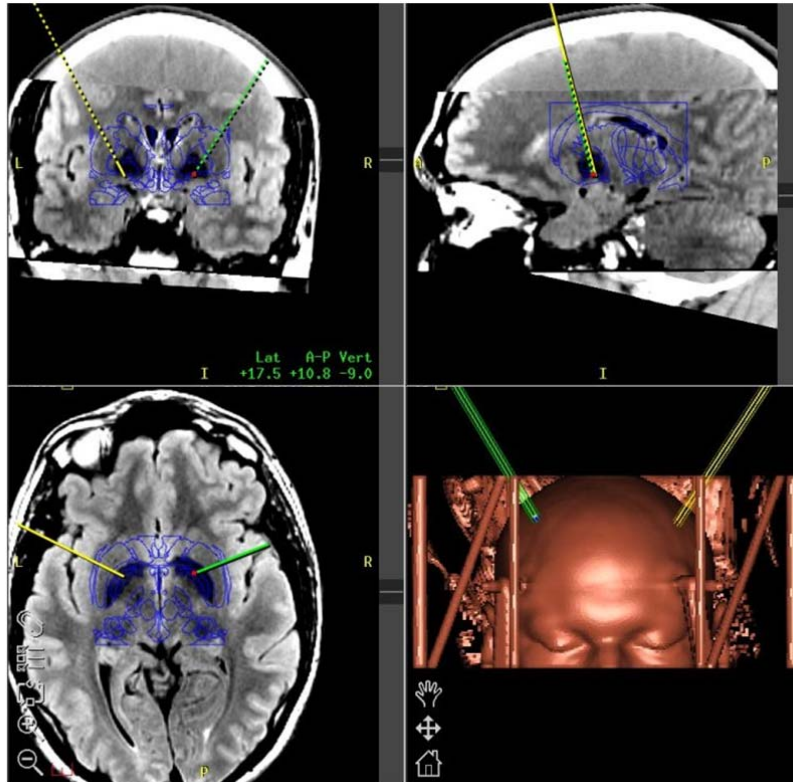

1 mm CT slices are merged with 3T General Electric MRI T1 and FLAIR sequences and placed on a Medtronic Stealth surgical planning station.

## FIGURE S2

Localization of Electrodes in the Brain of a Patient With Tourette Syndrome for Deep Brain Stimulation of the Antero-Medial Globus Pallidus Interna

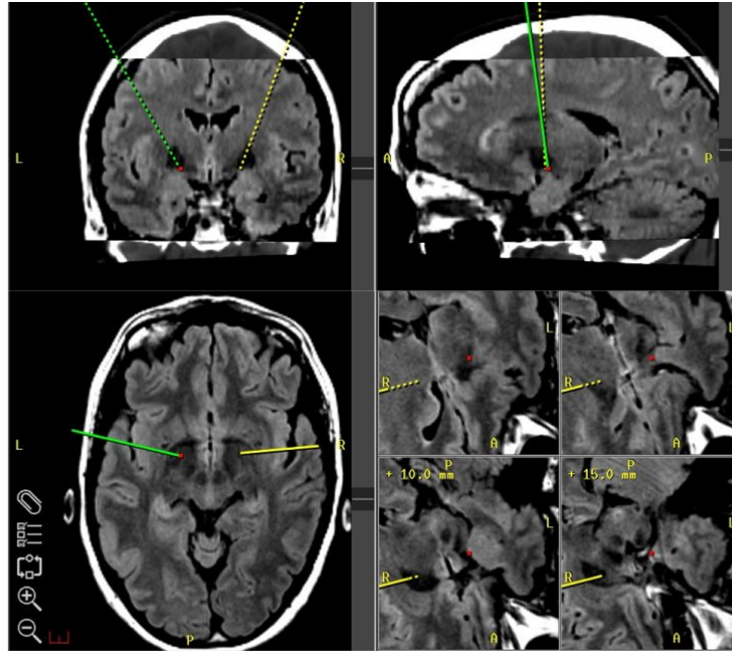

Supplement: appi.ajp.2012.11101583.ds001.pdf [file appi.ajp.2012.11101583.ds001.pdf]
